# Supplementary material for: Selection towards larger body size in both herbivorous and carnivorous synapsids during the Carboniferous
Source: Atypon-hosted journal article supplement (doi:10.1139/facets-2016-0046), 2017-01-01
Supplement: facets-2016-0046_supplement1.csv [file facets-2016-0046_supplement1.csv]

	Max First	Min First	Max Last	Min Last	Mass
Pantelosaurus	298.9	295.5	298.9	295.5	15
Cutleria	298.9	295.5	298.9	295.5	15
Ianthodon	305.4	303.7	305.4	303.7	17
H.garnettensis	305.4	303.7	305.4	303.7	16
H.baylei	295	292.6	295	292.6	9
E.boanerges	295	292.6	290.1	286.8	83
E.novomexicanus	298.9	297	292.6	290.1	63
E.colohistion	301.3	298.9	301.3	298.9	86
E.cruciger	293.8	292.6	283.5	277.9	166
E.pogonias	290.1	286.8	277.9	272.3	186
Lupeosaurus	295	292.6	290.1	286.8	166
Ianthasaurus	305.4	303.7	305.4	303.7	12
Glaucosaurus	286.8	277.9	286.8	277.9	?
Secodontosaurus	292.6	290.1	277.9	275.1	90
Ctenorhachis	292.6	290.1	290.1	286.8	61
S.ferox	298.9	297	292.6	290.1	52
S.ferocior	298.9	297	290.1	286.8	83
Cryptovenator	301.3	298.9	301.3	298.9	?
D.grandis	290.1	286.8	277.9	275.1	254
D.milleri	295	292.6	293.8	292.6	70
D.limbatus	295	292.6	277.9	275.1	129
C.casei	298	297	290.1	286.8	138
C.ninehevenis	298.9	295.5	298.9	295.5	52
B.borealis	286.8	283.5	286.8	283.5	?
Tetraceratops	277.9	275.1	277.9	275.1	?
Therapsida	272.3	272.2	272.3	272.2	?
E.mirabilis	301.3	298.9	301.3	298.9	5
D.natalis	293.8	292.6	277.9	275.1	28
D.macrospondylus	290.1	286.8	283.5	277.9	83
D.teutonis	290.1	283.5	290.1	283.5	19
D.occidentalis	298.9	295.5	298.9	295.5	55
D.loomisi	290.1	286.8	277.9	272.3	97
D.booneorum	292.6	290.1	290.1	286.8	63
D.dollovianus	293.8	292.6	283.5	277.9	147
D.giganhogomenes	290.1	286.8	275.1	272.3	166
