# Supplementary material for: Selection towards larger body size in both herbivorous and carnivorous synapsids during the Carboniferous
Source: Atypon-hosted journal article supplement (doi:10.1139/facets-2016-0046), 2017-01-01
Supplement: facets-2016-0046_supplement5.csv [file facets-2016-0046_supplement5.csv]

Species	Specimen	Mass	Time	Bin
Xyrospondylus_eocordii	KUVP 9963	11	305.4	Late Kazimovian
Haptodus_garnettensis	ROM 43604	16	305.4	Late Kazimovian
Ianthasaurus_hardestiorum	ROM 59933	12	305.4	Late Kazimovian
Ianthodon_schultzei	KUVP 133735	17	305.4	Late Kazimovian
Edaphosaurus_mirabilis	Praha Museum Specimen	5	301.3	Gzhelian
Edaphosaurus_colohistion	CM 23513	86	301.3	Gzhelian
Edaphosaurus_novomexicanus	FMNH UC 674	63	297	Asselian
Sphenacodon_ferox	MCZ 4778	74	297	Asselian
Pantelosaurus_saxonicus	S�achsisches Geologisches Landsamt Specimen	15	297	Asselian
Cutleria_wilmarthi	USNM 22099	15	297	Asselian
Ctenospondylus_ninevehensis	MCZ 3386	52	297	Asselian
Sphenacodon_ferocior	WM 11	81	293.8	Early Sakmarian
Dimetrodon_occidentalis	CM 26565	55	293.8	Early Sakmarian
Haptodus_baylei	Museum d'histoire Naturelle Specimen	9	293.8	Early Sakmarian
Lupeosaurus_kayi	MCZ 1454	105	293.8	Early Sakmarian
Dimetrodon_natalis	MCZ 1631	21	293.8	Early Sakmarian
Dimetrodon_milleri	MCZ 1367	90	293.8	Early Sakmarian
Edaphosaurus_boanerges	MCZ 1372	76	293.8	Early Sakmarian
Sphenacodon_ferocior	YP 1107	107	291.3	Late Sakmarian
Sphenacodon_ferox	WM 10	48	291.3	Late Sakmarian
Edaphosaurus_boanerges	MCZ 1531	95	291.3	Late Sakmarian
Ctenorhachis_jacksoni	USNM 437711	105	291.3	Late Sakmarian
Dimetrodon_natalis	MCZ 1632	21	291.3	Late Sakmarian
Dimetrodon_booneorum	AM 4826	105	291.3	Late Sakmarian
Dimetrodon_limbatus	AMNH 4636	179	291.3	Late Sakmarian
Lupeosaurus_kayi	AMNH 4024	164	291.3	Late Sakmarian
Dimetrodon_teutonis	MNG 10598	19	288.9	Early Artinskian
Dimetrodon_macrospondylus	AMNH 4012	107	288.9	Early Artinskian
Dimetrodon_limbatus	KU 705	210	288.9	Early Artinskian
Dimetrodon_natalis	UM 16201	37	288.9	Early Artinskian
Secodontosaurus_obtusidens	MCZ 1124	105	288.9	Early Artinskian
Dimetrodon_grandis	AMNH 4034	318	288.9	Early Artinskian
Ctenospondylus_casei	AMNH 4047	138	288.9	Early Artinskian
Edaphosaurus_cruciger	AMNH 4060	159	288.9	Early Artinskian
Edaphodsaurus_boanerges	MCZ 1286	102	288.9	Early Artinskian
Ctenorhachis_jacksoni	USNM 437710	61	288.9	Early Artinskian
Dimetrodon_booneorum	MCZ 1537	95	288.9	Early Artinskian
Dimetrodon_macrospondylus	AMNH 4065	109	283.5	Late Artinskian-Early Kungurian
Dimetrodon_dollovianus	AMNH 4064	147	283.5	Late Artinskian-Early Kungurian
Dimetrodon_giganhomogenes	MCZ 1342	213	283.5	Late Artinskian-Early Kungurian
Edaphosaurus_pogonias	AMNH 4015	186	275.1	Late Kungurian
Dimetrodon_loomisi	WM 1322	109	275.1	Late Kungurian
Dimetrodon_grandis	WM 1002	254	275.1	Late Kungurian
Dimetrodon_giganhomogenes	AMNH 4035	176	275.1	Late Kungurian
